# Supplementary material
Source: Research Square preprint supplement (doi:10.21203/rs.3.rs-9434716/v1)
Supplement: Supplementary file 1 [file 9181d4d68fd0f8de3b9bbe9d.docx]

Table S1. Candidate genes located within ±100 kb of significant SNPs associated with AGE100 identified by FarmCPU-based GWAS

| Chr | Gene start (bp) | Gene end (bp) | Candidate gene | Strand | SNP position (bp) | SNP ID | Effect (β) | SE | P value | Ref | Alt |
| --- | --- | --- | --- | --- | --- | --- | --- | --- | --- | --- | --- |
| 1 | 16007071 | 16017425 | LOC102166801 | + | 16066258 | 1:16066258 | 25.257 | 4.838 | 2.52 × 10^-9 | A | G |
| 1 | 16022299 | 16051345 | LOC100521647 | + | 16066258 | 1:16066258 | 25.257 | 4.838 | 2.52 × 10^-9 | A | G |
| 1 | 16057036 | 16059787 | LOC100521998 | - | 16066258 | 1:16066258 | 25.257 | 4.838 | 2.52 × 10^-9 | A | G |
| 1 | 16090757 | 16100784 | LOC106508817 | - | 16066258 | 1:16066258 | 25.257 | 4.838 | 2.52 × 10^-9 | A | G |
| 1 | 16113774 | 16119273 | ULBP1 | - | 16066258 | 1:16066258 | 25.257 | 4.838 | 2.52 × 10^-9 | A | G |
| 1 | 16139227 | 16198974 | LRP11 | + | 16066258 | 1:16066258 | 25.257 | 4.838 | 2.52 × 10^-9 | A | G |
| 1 | 75441568 | 75458140 | CD164 | - | 75549379 | 1:75549379 | -5.681 | 1.209 | 1.30 × 10^-7 | C | T |
| 1 | 75458244 | 75490563 | LOC102164525 | + | 75549379 | 1:75549379 | -5.681 | 1.209 | 1.30 × 10^-7 | C | T |
| 1 | 75465290 | 75508250 | PPIL6 | - | 75549379 | 1:75549379 | -5.681 | 1.209 | 1.30 × 10^-7 | C | T |
| 1 | 75508303 | 75511572 | SMPD2 | + | 75549379 | 1:75549379 | -5.681 | 1.209 | 1.30 × 10^-7 | C | T |
| 1 | 75511692 | 75522760 | MICAL1 | - | 75549379 | 1:75549379 | -5.681 | 1.209 | 1.30 × 10^-7 | C | T |
| 1 | 75531034 | 75548795 | ZBTB24 | - | 75549379 | 1:75549379 | -5.681 | 1.209 | 1.30 × 10^-7 | C | T |
| 1 | 75558009 | 75693415 | AK9 | - | 75549379 | 1:75549379 | -5.681 | 1.209 | 1.30 × 10^-7 | C | T |
| 6 | 108997730 | 109241950 | OSBPL1A | - | 109179333 | 6:109179333 | 6.156 | 1.190 | 6.16 × 10^-9 | T | C |
| 6 | 109109692 | 109126426 | LOC110261184 | + | 109179333 | 6:109179333 | 6.156 | 1.190 | 6.16 × 10^-9 | T | C |
| 6 | 109235590 | 109272801 | IMPACT | + | 109179333 | 6:109179333 | 6.156 | 1.190 | 6.16 × 10^-9 | T | C |
| 8 | 86087938 | 86330418 | RNF150 | + | 86291154 | 8:86291154 | 24.797 | 5.651 | 2.06 × 10^-7 | C | T |
| 8 | 86255028 | 86256907 | LOC100624892 | + | 86291154 | 8:86291154 | 24.797 | 5.651 | 2.06 × 10^-7 | C | T |
| 11 | 60399577 | 60409881 | LOC110255842 | - | 60498226 | 11:60498226 | -4.325 | 0.945 | 2.15 × 10^-7 | C | T |
| 11 | 60465224 | 60471717 | LOC110255843 | - | 60498226 | 11:60498226 | -4.325 | 0.945 | 2.15 × 10^-7 | C | T |
| 11 | 60471862 | 60534530 | LOC102165694 | - | 60498226 | 11:60498226 | -4.325 | 0.945 | 2.15 × 10^-7 | C | T |
| 13 | 195326573 | 195335273 | SOD1 | + | 195422305 | 13:195422305 | 5.603 | 1.155 | 1.16 × 10^-7 | C | G |
| 13 | 195335178 | 195396246 | SCAF4 | - | 195422305 | 13:195422305 | 5.603 | 1.155 | 1.16 × 10^-7 | C | G |
| 13 | 201231803 | 201525943 | KCNJ6 | - | 201424970 | 13:201424970 | 11.177 | 2.637 | 2.56 × 10^-7 | G | A |

Note. Candidate genes were identified by intersecting gene coordinates with a 100-kb window upstream and downstream of each significant SNP detected by the FarmCPU model. β indicates effect size; SE indicates standard error; genomic positions are presented in base pairs (bp).

Table S2. Candidate genes located within ±100 kb of significant SNPs associated with AGE115 identified by FarmCPU-based GWAS

| Chr | Gene start (bp) | Gene end (bp) | Candidate gene | Strand | SNP position (bp) | SNP ID | Effect (β) | SE | P value | Ref | Alt |
| --- | --- | --- | --- | --- | --- | --- | --- | --- | --- | --- | --- |
| 4 | 6055870 | 6199036 | LOC110260214 | - | 6242294 | 4:6242294 | 4.011 | 0.832 | 1.47 × 10^-7 | G | C |
| 4 | 6226853 | 6241270 | LOC110260446 | - | 6242294 | 4:6242294 | 4.011 | 0.832 | 1.47 × 10^-7 | G | C |
| 4 | 6289577 | 6446494 | KHDRBS3 | - | 6242294 | 4:6242294 | 4.011 | 0.832 | 1.47 × 10^-7 | G | C |
| 6 | 108997730 | 109241950 | OSBPL1A | - | 109179333 | 6:109179333 | 6.999 | 1.525 | 1.42 × 10^-7 | T | C |
| 6 | 109109692 | 109126426 | LOC110261184 | + | 109179333 | 6:109179333 | 6.999 | 1.525 | 1.42 × 10^-7 | T | C |
| 6 | 109235590 | 109272801 | IMPACT | + | 109179333 | 6:109179333 | 6.999 | 1.525 | 1.42 × 10^-7 | T | C |
| 8 | 86087938 | 86330418 | RNF150 | + | 86291154 | 8:86291154 | 33.051 | 7.086 | 5.69 × 10^-8 | C | T |
| 8 | 86255028 | 86256907 | LOC100624892 | + | 86291154 | 8:86291154 | 33.051 | 7.086 | 5.69 × 10^-8 | C | T |
| 8 | 122550964 | 122706023 | LOC110262187 | - | 122750153 | 8:122750153 | 4.124 | 0.800 | 2.70 × 10^-8 | T | C |
| 11 | 60399577 | 60409881 | LOC110255842 | - | 60498226 | 11:60498226 | -6.149 | 1.181 | 8.12 × 10^-9 | C | T |
| 11 | 60465224 | 60471717 | LOC110255843 | - | 60498226 | 11:60498226 | -6.149 | 1.181 | 8.12 × 10^-9 | C | T |
| 11 | 60471862 | 60534530 | LOC102165694 | - | 60498226 | 11:60498226 | -6.149 | 1.181 | 8.12 × 10^-9 | C | T |
| 13 | 195326573 | 195335273 | SOD1 | + | 195422305 | 13:195422305 | 7.502 | 1.446 | 1.65 × 10^-8 | C | G |
| 13 | 195335178 | 195396246 | SCAF4 | - | 195422305 | 13:195422305 | 7.502 | 1.446 | 1.65 × 10^-8 | C | G |
| 14 | 62125866 | 62525688 | LOC110256651 | - | 62356543 | 14:62356543 | 13.541 | 2.755 | 1.12 × 10^-7 | C | T |

Note. Candidate genes were identified by intersecting gene coordinates with a 100-kb window upstream and downstream of each significant SNP detected by the FarmCPU model. β indicates effect size; SE indicates standard error; genomic positions are presented in base pairs (bp).

Table S3. Candidate genes located within ±100 kb of significant SNPs associated with BF100 identified by FarmCPU-based GWAS

| Chr | Gene start (bp) | Gene end (bp) | Candidate gene | Strand | SNP position (bp) | SNP ID | Effect (β) | SE | P value | Ref | Alt |
| --- | --- | --- | --- | --- | --- | --- | --- | --- | --- | --- | --- |
| 3 | 13565439 | 14794365 | AUTS2 | + | 14405173 | 3:14405173 | -0.710 | 0.138 | 3.29 × 10^-8 | A | G |
| 3 | 14348358 | 14359443 | LOC110260079 | + | 14405173 | 3:14405173 | -0.710 | 0.138 | 3.29 × 10^-8 | A | G |
| 10 | 43901590 | 43929441 | HACD1 | - | 43943091 | 10:43943091 | 0.395 | 0.083 | 2.70 × 10^-7 | A | G |
| 10 | 43946990 | 44016064 | STAM | + | 43943091 | 10:43943091 | 0.395 | 0.083 | 2.70 × 10^-7 | A | G |

Note. Candidate genes were identified by intersecting gene coordinates with a 100-kb window upstream and downstream of each significant SNP detected by the FarmCPU model. β indicates effect size; SE indicates standard error; genomic positions are presented in base pairs (bp).

Table S4. Candidate genes located within ±100 kb of significant SNPs associated with BF115 identified by FarmCPU-based GWAS

| Chr | Gene start (bp) | Gene end (bp) | Candidate gene | Strand | SNP position (bp) | SNP ID | Effect (β) | SE | P value | Ref | Alt |
| --- | --- | --- | --- | --- | --- | --- | --- | --- | --- | --- | --- |
| 3 | 13565439 | 14794365 | AUTS2 | + | 14405173 | 3:14405173 | -0.794 | 0.160 | 8.81 × 10^-8 | A | G |
| 3 | 14348358 | 14359443 | LOC110260079 | + | 14405173 | 3:14405173 | -0.794 | 0.160 | 8.81 × 10^-8 | A | G |

Note. Candidate genes were identified by intersecting gene coordinates with a 100-kb window upstream and downstream of each significant SNP detected by the FarmCPU model. β indicates effect size; SE indicates standard error; genomic positions are presented in base pairs (bp).

Table S5. Candidate genes located within ±100 kb of significant SNPs associated with BW identified by FarmCPU-based GWAS

| Chr | Gene start (bp) | Gene end (bp) | Candidate gene | Strand | SNP position (bp) | SNP ID | Effect (β) | SE | P value | Ref | Alt |
| --- | --- | --- | --- | --- | --- | --- | --- | --- | --- | --- | --- |
| 1 | 271103838 | 271210292 | NUP214 | + | 271236425 | 1:271236425 | -0.257 | 0.053 | 2.03 × 10⁻⁷ | G | A |
| 1 | 271234717 | 271244575 | LOC110256424 | + | 271236425 | 1:271236425 | -0.257 | 0.053 | 2.03 × 10⁻⁷ | G | A |
| 1 | 271242312 | 271257839 | FAM78A | - | 271236425 | 1:271236425 | -0.257 | 0.053 | 2.03 × 10⁻⁷ | G | A |
| 1 | 271260237 | 271271368 | LOC102166638 | - | 271236425 | 1:271236425 | -0.257 | 0.053 | 2.03 × 10⁻⁷ | G | A |
| 1 | 271268843 | 271283657 | PLPP7 | + | 271236425 | 1:271236425 | -0.257 | 0.053 | 2.03 × 10⁻⁷ | G | A |
| 1 | 271271751 | 271273433 | LOC110256425 | + | 271236425 | 1:271236425 | -0.257 | 0.053 | 2.03 × 10⁻⁷ | G | A |
| 4 | 118600361 | 119065669 | PLPPR5 | + | 118531251 | 4:118531251 | 0.227 | 0.046 | 1.42 × 10⁻⁸ | G | C |
| 7 | 112561985 | 112753666 | RPS6KA5 | - | 112710908 | 7:112710908 | -0.096 | 0.021 | 3.17 × 10⁻⁷ | A | G |
| 7 | 112753719 | 112862247 | C7H14orf159 | + | 112710908 | 7:112710908 | -0.096 | 0.021 | 3.17 × 10⁻⁷ | A | G |
| 12 | 36894727 | 37475221 | BCAS3 | - | 37347389 | 12:37347389 | -1.086 | 0.172 | 1.93 × 10⁻¹¹ | C | A |
| 13 | 123176077 | 123357551 | MAP3K13 | + | 123429512 | 13:123429512 | 1.168 | 0.246 | 1.16 × 10⁻⁷ | T | A |
| 13 | 123356438 | 123365206 | TMEM41A | - | 123429512 | 13:123429512 | 1.168 | 0.246 | 1.16 × 10⁻⁷ | T | A |
| 13 | 123372909 | 123419505 | LIPH | - | 123429512 | 13:123429512 | 1.168 | 0.246 | 1.16 × 10⁻⁷ | T | A |
| 13 | 123429915 | 123469913 | SENP2 | + | 123429512 | 13:123429512 | 1.168 | 0.246 | 1.16 × 10⁻⁷ | T | A |
| 13 | 123485619 | 123650050 | IGF2BP2 | - | 123429512 | 13:123429512 | 1.168 | 0.246 | 1.16 × 10⁻⁷ | T | A |
| 13 | 197007303 | 197035604 | IFNGR2 | + | 197052204 | 13:197052204 | -0.085 | 0.018 | 1.26 × 10⁻⁷ | G | C |
| 13 | 197048285 | 197093308 | TMEM50B | - | 197052204 | 13:197052204 | -0.085 | 0.018 | 1.26 × 10⁻⁷ | G | C |
| 13 | 197104842 | 197114693 | DNAJC28 | - | 197052204 | 13:197052204 | -0.085 | 0.018 | 1.26 × 10⁻⁷ | G | C |
| 13 | 197130898 | 197158797 | GART | - | 197052204 | 13:197052204 | -0.085 | 0.018 | 1.26 × 10⁻⁷ | G | C |
| 14 | 122848727 | 123217568 | VTI1A | + | 123275061 | 14:123275061 | 1.347 | 0.246 | 5.69 × 10⁻⁹ | A | G |
| 14 | 123343695 | 123547332 | TCF7L2 | + | 123275061 | 14:123275061 | 1.347 | 0.246 | 5.69 × 10⁻⁹ | A | G |

Note. Candidate genes were identified by intersecting gene coordinates with a 100-kb window upstream and downstream of each significant SNP detected by the FarmCPU model. β indicates effect size; SE indicates standard error; genomic positions are presented in base pairs (bp).
