# Supplementary material
Source: Research Square preprint supplement (doi:10.21203/rs.3.rs-9434716/v1)
Supplement: Supplementary file 2 [file a2efb268b5930e9cbe840c29.docx]

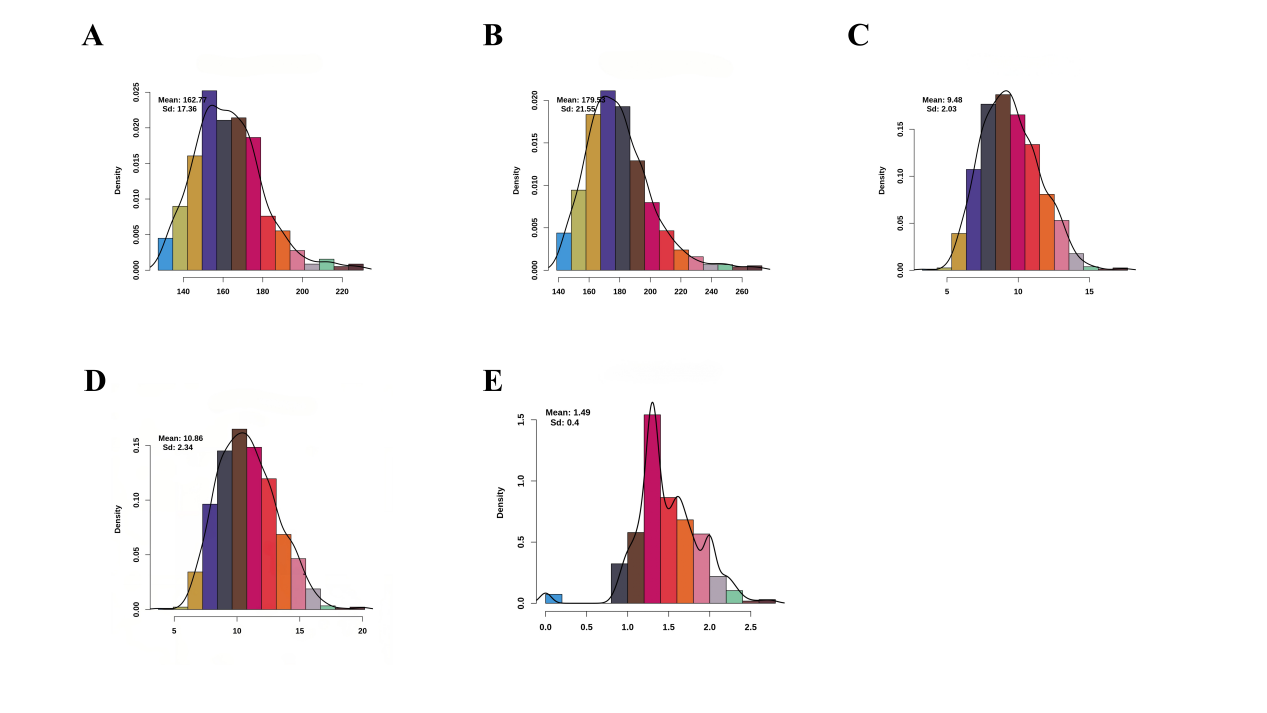


Figure S1. Distribution of phenotypic values for AGE100, AGE115, BF100, BF115, and BW in the study population. (A) AGE100, (B) AGE115, (C) BF100, (D) BF115, (E) BW.
